# Supplementary material
Source: HighWire-hosted journal article supplement (https://erj.ersjournals.com/content/60/1/2200318)
Supplement: inline-supplementary-material-1 [file inline-supplementary-material-1.pdf]

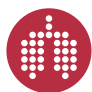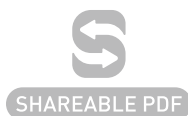

# Controlling chronic respiratory diseases in Finland from 1996 to 2018

Tiina Mattila <sup>1,2</sup>, Marina Erhola<sup>2,3</sup>, Tuula Vasankari <sup>4,5</sup>, Sanna Toppila-Salmi<sup>6,7</sup>, Fredrik Herse<sup>8</sup>, Riikka-Leena Leskelä<sup>8</sup>, Vesa Jormanainen<sup>2</sup>, Anelma Lammi<sup>5</sup> and Tari Haahtela<sup>6,7</sup>

<sup>1</sup>Department of Pulmonary Diseases, Heart and Lung Center, Helsinki University Hospital and Helsinki University, Meilahti Triangle Hospital, Helsinki, Finland. <sup>2</sup>Finnish Institute for Health and Welfare, Helsinki, Finland. <sup>3</sup>Päijät-Häme Joint Authority for Health and Welfare, Lahti, Finland. <sup>4</sup>University of Turku, Department of Pulmonary Diseases and Clinical Allergology, Turku, Finland. <sup>5</sup>Finnish Lung Health Association (FILHA), Helsinki, Finland. <sup>6</sup>University of Helsinki, Helsinki, Finland. <sup>7</sup>Skin and Allergy Hospital, Helsinki University Hospital, Helsinki, Finland. <sup>8</sup>Nordic Healthcare Group, Helsinki, Finland.

Corresponding author: Tiina Mattila ([tiina.m.mattila@hus.fi](mailto:tiina.m.mattila@hus.fi))

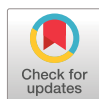

Shareable abstract (@ERSpublications)

**A nationwide, long-term and systematic lung health policy has been implemented in Finland. The real-world data indicate that the burden of respiratory diseases has reduced both for patients and, overall, for society.** <https://bit.ly/3LvPjjv>

**Cite this article as:** Mattila T, Erhola M, Vasankari T, *et al.* Controlling chronic respiratory diseases in Finland from 1996 to 2018. *Eur Respir J* 2022; 60: 2200318 [DOI: 10.1183/13993003.00318-2022].

This single-page version can be shared freely online.

Copyright ©The authors 2022. For reproduction rights and permissions contact [permissions@ersnet.org](mailto:permissions@ersnet.org)

Received: 13 Jan 2022  
Accepted: 12 May 2022

From the 1990s, five national programmes were carried out in Finland to respond to respiratory health challenges [1–6]. Previous experience from tuberculosis facilitated the launch of other initiatives. The programmes were implemented in the national public healthcare. Importantly, professional associations, non-governmental patient organisations (NGOs) and pharmacies contributed to the change of clinical practices.
